# Supplementary material
Source: PubMed Central journal article supplement (PMC2197206)
Supplement: rspb20060191s15.pdf [file rspb20060191s15.pdf]

1 **Electronic Appendix**

2 To “**1200 years of regular outbreaks in alpine insects**”

3 By Jan Esper, Ulf Büntgen, David C. Frank, Daniel Nievergelt, and Andrew Liebhold

4

5 ***A. Chronology development***

6 Following standard dendrochronological procedures (Fritts 1976), a mean chronology  
7 averaging all 47,513 MXD measurements was compiled. This raw, non-detrended MXD  
8 chronology (figure S1a, blue curve) displayed long-term trends induced by changes in sample  
9 structure, and high frequency negative departures induced by LBM outbreaks. The low  
10 frequency component originated from the so-called “age trend” commonly found in raw tree-  
11 ring data, i.e., MXD values of individual trees showed decreasing values with aging  
12 (Schweingruber *et al.* 1978). As a consequence, the chronology tended towards lower values  
13 when the underlying data were on average from older tree-rings (e.g., the 11th-12th  
14 centuries), and sharply increased when old data dropped out and the chronology was refreshed  
15 with younger material (e.g., the 1200’s). The timing of these effects was highlighted by the  
16 mean age and sample replication curves (figure S1c) accompanying the MXD chronology.

17

18

**Figure S1**

19

20 Figure S1. MXD chronology and LBM outbreak detection. (a) Original (blue) and gap-filled  
21 (red) MXD records combining data from 180 larch samples. (b) Difference series (blue)  
22 between the gap-filled and original data, and the age-effect corrected version of this record  
23 (orange). The correction was accomplished by excluding tree-rings younger than 63 years  
24 from the data (see figure S3). Values less than  $-0.005 \text{ g/cm}^3$  are shown. (c) Mean age curve of

25 the MXD data (black) shown in (a), and sample replication of the gap-filled (blue) and age-  
26 effect corrected (orange) data. (d) Percentage of tree-rings affected by LBM outbreaks. These  
27 rings were removed from the data, and re-estimated using data from unaffected rings. The  
28 resulting record is shown in (a, red curve). Grey bars indicate low LBM intensity and low  
29 mean biological age periods in the 12th and 17th centuries.

30

### 31 ***B. Gap-filling LBM detection procedure***

32 For LBM signal detection we analysed these raw data (sample-by-sample, year-by-year) for  
33 exceptionally low MXD values, removed the affected rings (figure S1d), and statistically re-  
34 estimated the gaps using data from trees unaffected during the year under investigation. In  
35 detail, for each year this gap-filling procedure comprised: (i) averaging the MXD values of  
36 the remaining rings, (ii) adjusting the variance of the mean values of un-affected rings to the  
37 variance of the measurement series from which the ring was removed, (iii) replacing the gap  
38 with the variance adjusted value obtained from un-affected rings, (iv) calculating a mean  
39 utilizing the gap-filled and unaffected data (figure S1a, red curve). A difference series  
40 between the original measurements and these gap-filled (LBM signal removed) MXD data  
41 (figure S1b, blue curve) provided the basic information on past LBM outbreaks.

42 The effects of this procedure on the single MXD measurement series are highlighted for  
43 the 1540-1560 period including the 1548 and 1556 LBM outbreak years (figure S2).  
44 Examination of wood samples and MXD profiles enabled the identification of 41 rings (70%)  
45 in 1548 and 42 rings (69%) in 1556 as being affected by defoliation events (negative spikes in  
46 figure S2a). Substitution of these data utilizing the MXD values from un-affected rings  
47 resulted in average densities of 0.83 g/cm<sup>3</sup> in 1548 and 0.91 g/cm<sup>3</sup> in 1556, and residuals  
48 between the mean original and gap-filled data of 0.31 g/cm<sup>3</sup> in 1548 and 0.28 g/cm<sup>3</sup> in 1556  
49 (figure S2c).

50

51

## Figure S2

52

53 Figure S2. Gap-filling procedure in individual MXD timeseries. (a) Original MXD  
54 measurement series including the 1548 and 1556 LBM outbreak years. Each series represents  
55 a single larch core sample from which density measurements were computed. (b) Gap-filled  
56 MXD measurement series with the LBM effects in 1548 and 1556 removed from the data. (c)  
57 Comparison of the original and gap-filled mean records.

58

### 59 *C. Age-effect correction of the LBM reconstruction*

60 The difference record between original and gap-filled data (figure S1b, blue curve) revealed a  
61 correlation between tree age and LBM signals, i.e., younger tree-rings were less severely  
62 affected by LBM defoliation. This age-effect in the outbreak record was analysed by aligning  
63 the original and gap-filled MXD data by biological age (Esper *et al.* 2003), and plotting the  
64 annual differences between these data against tree-age (figure S3). We iteratively removed  
65 successively larger proportions of the data from the youngest ages and fitted linear models of  
66 annual differences as a function of age.

67 It was found that removing data from ages <63 years resulted in a line with slope near  
68 zero, and from this concluded that 63 years was an optimal minimum age for detection of  
69 outbreaks. Consequently, we removed all juvenile tree-rings <63 years from the analysis, and  
70 calculated a MXD chronology and the gap-filling procedure from data considering mature  
71 tree-rings only. The difference series between these timeseries is shown in figure S1b (orange  
72 curve) together with the difference series between the “standard” gap-filled and original MXD  
73 timeseries including juvenile tree-rings (blue curve).

74 Removal of juvenile rings reduced sample replication (figure S1c, orange curve), but  
75 increased the LBM signal fidelity during periods of the past millennium when large  
76 proportions of juvenile tree-ring material suppressed the detection of budmoth events, e.g., the  
77 12th and 17th centuries (grey bars in figure S1). The age restriction essentially accounted for  
78 the fact that younger larch trees are less affected by foliage feeding than are older trees.

79

80

### Figure S3

81

82 Figure S3. Age-effect in LBM outbreak detection. (a) Larch sample replication (grey curve),  
83 number of gaps (black curve), and percent gaps (grey shading), all aligned by biological tree  
84 age. Gaps represent LBM-affected tree-rings that were removed from the MXD data. The  
85 percent record represents the number of gaps related to the total number of samples for each  
86 ring-age (1-460). (b) Mean original (grey) and gap-filled (black) MXD curves after aligning  
87 the data by biological age, with sample replication as in (a). Since the gap-filling procedure  
88 includes the substitution of LBM-affected (low density) with non-affected (higher density)  
89 tree-rings, the gap-filled series shows generally higher values than the original curve. The  
90 scatter plot at the bottom of the figure shows the annual differences between gap-filled and  
91 original MXD records, and the linear models fit to difference data <63 and >62 years.

92

#### 93 ***D. Validation of the LBM reconstruction***

94 In order to evaluate the accuracy of the methodologies and resultant outbreak reconstruction,  
95 results are compared with methodologically more conventional estimates of LBM abundance  
96 (figure S4). This involved comparisons of MXD and TRW anomalies between host (larch)  
97 and non-host (fir and spruce) data, i.e. common variations are interpreted as the result of  
98 climatic anomalies, while negative outliers in only the larch data are interpreted as the result  
99 of LBM outbreaks (Weber 1997; Rolland *et al.* 2001). Specifically, a 600-year record from

100 Tyrol in Austria (Esper *et al.* 2002) and a 1000-year record from Lauenen in Switzerland  
101 (Schweingruber *et al.* 1979) were compared (figure 1).

102

103

#### Figure S4

104

105 Figure S4. LBM outbreak reconstruction and validation. (a) Age-corrected LBM  
106 reconstruction as shown in figure S1b. (b) Difference records between larch (MXD and TRW)  
107 data and the non-host fir/spruce chronologies from Lauenen and Tyrol. (c) Combined larch  
108 MXD and lag-1 TRW record. For the lagged LBM response in the TRW data see figure S5.  
109 MXD and TRW data were detrended using flexible cubic spline filters before combination to  
110 emphasize inter-annual variations. Values exceeding one standard deviation are shown.

111

112 Correlations between the original (i.e. non gap-filled) larch and non-host Tyrol and  
113 Lauenen MXD chronologies were 0.36 and 0.34, respectively, calculated over the 1368-1975  
114 common period. These correlations increased to 0.54 for both chronologies after removing the  
115 LBM signal from the larch record via gap-filling. Differences between the original host and  
116 non-host chronologies that exceeded one standard deviation were denoted as candidate LBM  
117 outbreak years (figure S4b). A comparison of the gap-filled reconstruction with these  
118 conventional approaches yields correlations ranging from 0.61-0.83 (1368-1975 period).  
119 These highly significant values indicated that the identification and substitution of LBM  
120 affected tree-rings within the gap-filling procedure resulted in reconstructions similar to time  
121 series utilizing more traditional approaches of host/non-host differences.

122 A further evaluation of the LBM reconstruction was accomplished via comparison of the  
123 series with negative deviations derived from a combined MXD plus lag-1 TRW larch record  
124 (figure S4c). The rationale for this approach was based upon the higher autocorrelation and

125 lagged effects of defoliation signals in TRW data (figure S5). Comparison of the LBM  
126 reconstruction with the combined MXD plus lag-1 TRW record indicated a correlation of 0.50  
127 (1368-1975 period).

128

129

130

### Figure S5

131

132 Figure S5. LBM patterns in tree-ring data. Average MXD ( $\text{g/cm}^3$ ) and TRW (mm) values  
133 centred on the 123 LBM outbreak events (year 0) and 5 years before and after these events  
134 (red curve). Grey shadings indicate two standard errors, and horizontal black lines the average  
135 MXD ( $0.838 \text{ g/cm}^3$ ) and TRW ( $0.536 \text{ mm}$ ) values over the 11-year periods displayed here.  
136 Blue and green curves are the MXD and TRW patterns calculated using data before and after  
137 1400, respectively. The means for these sub-periods have been adjusted to the average using  
138 all data (horizontal lines).

139

### 140 References

141 Esper, J., Cook, E. R. & Schweingruber, F. H. 2002 Low-frequency signals in long tree-ring  
142 chronologies and the reconstruction of past temperature variability. *Science* **295**, 2250-2253.

143 Esper, J., Cook, E. R., Krusic, P. J., Peters, K. & Schweingruber, F. H. 2003 Tests of the RCS  
144 method for preserving low-frequency variability in long tree-ring chronologies. *Tree-Ring*  
145 *Res.* **59**, 81-98.

146 Fritts, H.C. 1976 *Tree Rings and Climate*. New York: Academic Press.

147 Rolland, C., Baltensweiler, W. & Petitcolas, V. 2001 The potential of using *Larix decidua*  
148 ring widths in reconstructions of larch budmoth (*Zeiraphera diniana*) outbreak history:  
149 dendrochronological estimates compared with insect surveys. *Trees* **15**, 414-426.

150 Schweingruber, F. H., Fritts, H. C., Bräker, O. U., Drew, L. G. & Schär, E. 1978 The X-ray  
151 technique as applied to dendroclimatology. *Tree-Ring Bull.* **38**, 61-91.

- 152 Schweingruber, F. H., Bräker, O. U. & Schär, E. 1979 Dendroclimatic studies on conifers  
153 from central Europe and Great Britain. *Boreas* **8**, 427-452.
- 154 Weber, U. 1997 Dendrochronological reconstruction and interpretation of larch budmoth  
155 (*Zeiraphera diniana*) outbreaks in two central alpine valleys of Switzerland from 1470-1990.  
156 *Trees* **11**, 277-290.
- 157
